# Supplementary material
Source: Springer Nature journal article supplement (https://www.springermedizin.de/resource/supplementary/13054_2013_2249_MOESM1_ESM.pdf/9713858)
Supplement: MOESM1 [file 9713858]

**APPENDIX 1**

**GTEI/SEMICYUC SURVEY  
VENTILATOR-ASSOCIATED TRACHEOBRONCHITIS (VAT)**

| <b>Country</b>                                                                                                                                                                                                                                                                                                                                                                              | <b>City</b>                                                                                                                                                                                                                                                                                                                                                                                                                        |
|---------------------------------------------------------------------------------------------------------------------------------------------------------------------------------------------------------------------------------------------------------------------------------------------------------------------------------------------------------------------------------------------|------------------------------------------------------------------------------------------------------------------------------------------------------------------------------------------------------------------------------------------------------------------------------------------------------------------------------------------------------------------------------------------------------------------------------------|
| <b>Nº of total beds at the Hospital</b><br>a) <100<br>b) 100-200<br>c) 201-500<br>d) >500                                                                                                                                                                                                                                                                                                   | <b>Nº of ICU beds</b><br>a) <10<br>b) 10-20<br>c) 21-50<br>d) > 50                                                                                                                                                                                                                                                                                                                                                                 |
| <b>Type of Hospital</b><br>a) Public<br>b) Private<br>c) Mixed<br><br><b>Academic degree of the Hospital</b><br>a) University<br>b) Non-university                                                                                                                                                                                                                                          | <b>Type of ICU</b><br>a) Medical /mixed<br>b) Neurologic<br>c) General surgery<br>d) Cardiovascular surgery<br>e) Burns<br>f) Medical cardiovascular<br>g) Medical respiratory                                                                                                                                                                                                                                                     |
| <b>1.- In what type of patients do you consider VAT more frequently?</b><br>a) All the ICU patients<br>b) Medical patients<br>c) Surgical patients<br>d) Neurological patients<br>e) Trauma patients<br>f) Unstable patients<br>g) Unstable patients (independently of the cause)<br>h) COPD patients                                                                                       | <b>2.- Which are the criteria that you usually use for diagnosis of VAT?</b><br>a) Only clinical criteria (fever + purulent respiratory secretion)<br>b) Clinical criteria plus microbiological criteria<br>c) by exclusion                                                                                                                                                                                                        |
| <b>3.- Which are the microbiologic methods that you usually use for the diagnosis of VAT?</b><br>a) Gram stain of respiratory secretions<br>b) Qualitative culture of respiratory secretions<br>c) Quantitative culture of respiratory secretions ( $10^5$ ETA; $10^4$ BAL; $10^3$ PSB)                                                                                                     | <b>4.- Which diagnostic technique commonly used for the diagnosis of VAT?</b><br>a) Tracheal aspirate<br>b) Broncho-alveolar lavage (BAL)<br>c) Mini-BAL<br>d) Protected brush (PSB)                                                                                                                                                                                                                                               |
| <b>5.- In your opinion, which are the situations to perform a bronchoscopy for the diagnosis of VAT?</b><br>a) Never<br>b) Always<br>c) Only if I decide to start an antibiotic treatment<br>d) Only when the chest x-ray is not conclusive                                                                                                                                                 | <b>6.- In your opinion, which are the situations to perform a CT scan for the diagnosis of VAT?</b><br>a) Never<br>b) Always<br>c) Only when the chest x-ray is not conclusive                                                                                                                                                                                                                                                     |
| <b>7.- Do you consider that the microbiological documentation is useful to select the appropriate antibiotic treatment?</b><br>a) Yes<br>b) No                                                                                                                                                                                                                                              | <b>8.- If you receive a negative Gram stain of respiratory secretion from patients with VAT suspected; do you wait for the culture results before start the antibiotic treatment?</b><br>a) Yes<br>b) No                                                                                                                                                                                                                           |
| <b>9.- Which is your antimicrobial strategy to manage a patients with VAT in the ICU?</b><br>a) None<br>b) Always start with broad-spectrum intravenous (IV) antibiotic (AB)<br>c) Always start with narrow-spectrum IV AB<br>d) Select the AB according the mechanical ventilation (MV) days<br>e) Always start with nebulized AB<br>f) Always start with broad-spectrum IV + nebulized AB | <b>10.- Do you consider that all the patients with VAT must receive antibiotic treatment?</b><br>a) Yes<br>b) No<br>c) I don't know<br>d) Only in patients with cardiovascular and/or respiratory failure                                                                                                                                                                                                                          |
| <b>11.- In which type of patients with VAT do you consider to indicate antibiotic treatment?</b><br>a) All the ICU patients<br>b) Medical patients<br>c) Surgical patients<br>d) Neurological patients<br>e) Trauma patients<br>f) Unstable patients (independently of the cause)<br>g) COPD patients                                                                                       | <b>12.- When do you usually start the antibiotic treatment in patients with VAT?</b><br>a) <12 h<br>b) 12-24 h<br>c) 25-48 h<br>d) > 48h<br>e) Never                                                                                                                                                                                                                                                                               |
| <b>13.- In your opinion; which is the most appropriate option for treating patients with VAT?</b><br>a) intravenous (IV) antibiotic (AB) in monotherapy<br>b) IV AB in combination<br>c) IV AB plus nebulized AB in monotherapy<br>d) IV AB plus nebulized AB in combination                                                                                                                | <b>14.- If you decide to start and antibiotic (AB) treatment for VAT ....</b><br>a) Do you maintain the initial AB treatment for 7-10 days?<br>b) Do you maintain AB 7 -10 days but de-escalate when receive the microbiologic results?<br>c) Do you maintain AB 14 days?<br>d) Do you maintain AB until the resolution of the clinical parameters (fever + respiratory secretions)?<br>e) Do you use short AB treatment (< 7days) |
| <b>15.- Do you decide the selection of the antibiotic (AB) treatment according to the characteristics of the VAT (early or late)?</b><br>a) Yes<br>b) No                                                                                                                                                                                                                                    | <b>16.- Do you consider that VAT increases the mechanical ventilator days?</b><br>a) Yes<br>b) No                                                                                                                                                                                                                                                                                                                                  |
| <b>17.- Do you consider that the VAT increases the ICU length of stays?</b><br>a) Yes<br>b) No                                                                                                                                                                                                                                                                                              | <b>18.- Do you consider that the VAT increases the ICU patient's mortality?</b><br>a) Yes<br>b) No                                                                                                                                                                                                                                                                                                                                 |
| <b>19.- Which antibiotic/s do you usually use for treating patients with early-onset VAT</b>                                                                                                                                                                                                                                                                                                | <b>20.- Which antibiotic/s do you usually use for treating patients with late-</b>                                                                                                                                                                                                                                                                                                                                                 |

|                                                                                                                                                                                                                                                                                                                                                                  |                                                                                                                                                                                                                                                                                                                                                                           |
|------------------------------------------------------------------------------------------------------------------------------------------------------------------------------------------------------------------------------------------------------------------------------------------------------------------------------------------------------------------|---------------------------------------------------------------------------------------------------------------------------------------------------------------------------------------------------------------------------------------------------------------------------------------------------------------------------------------------------------------------------|
| <p><b>(&lt; 5 day of mechanical ventilation)?</b></p> <ul style="list-style-type: none"> <li>a) Carbapenems</li> <li>b) Fluoroquinolones</li> <li>c) Third generation non-Pseudomonal cephalosporins</li> <li>d) Amoxicillin-clavulanate</li> <li>e) Amikacin</li> <li>f) Polymixuns</li> <li>g) Vancomicycn</li> <li>h) Linezolid</li> <li>i) others</li> </ul> | <p><b>onset VAT (&gt; o =5 day of mechanical ventilation)?</b></p> <ul style="list-style-type: none"> <li>a) Carbapenems</li> <li>b) Fluoroquinolones</li> <li>c) Third generation Pseudomonal cephalosporins</li> <li>d) Amoxicillin-clavulanate</li> <li>e) Amikacin</li> <li>f) Polymixuns</li> <li>g) Vancomicycn</li> <li>h) Linezolid</li> <li>i) others</li> </ul> |
| <p><b>21.- Are the physicians of your ICU familiar with the use of nebulized antibiotic for treating patients with VAT?</b></p> <ul style="list-style-type: none"> <li>a) Yes</li> <li>b) No</li> </ul>                                                                                                                                                          | <p><b>22.- Do you consider the use of nebulized antibiotics useful for treating patients with VAT?</b></p> <ul style="list-style-type: none"> <li>a) Yes</li> <li>b) No</li> </ul>                                                                                                                                                                                        |
| <p><b>23.- Which antibiotic do you use to nebulizer in patients with VAT?</b></p> <ul style="list-style-type: none"> <li>a) Colistin</li> <li>b) Tobramicycn</li> <li>c) Amikacin</li> <li>d) others</li> </ul>                                                                                                                                                  |                                                                                                                                                                                                                                                                                                                                                                           |
